# Supplementary material
Source: PubMed Central journal article supplement (PMC6221824)
Supplement: supp_the2017-0674_onco12455-sup-0002-Tables01.pdf [file supp_the2017-0674_onco12455-sup-0002-Tables01.pdf]

Supplemental Tables for:  
CheckMate 141: 1-Year Update and Subgroup Analysis of Nivolumab as First-line Therapy in Patients With Recurrent/Metastatic Head and Neck Cancer  
Maura L Gillison et al.

**Table S1.** Baseline characteristics among patients randomized to nivolumab or investigator's choice as first-line treatment for recurrent or metastatic squamous cell carcinoma of the head and neck after progressing on or after platinum therapy (within 6 months) in the adjuvant or primary (i.e., with radiation) setting for locally advanced disease.

| Characteristics                             | Nivolumab<br>( <i>n</i> = 52) | Investigator's choice<br>( <i>n</i> = 26) |
|---------------------------------------------|-------------------------------|-------------------------------------------|
| <b>Age, median (range), years</b>           | 57.5 (30–79)                  | 59.5 (28–78)                              |
| <b>Age ≥65 years, <i>n</i> (%)</b>          | 13 (25.0)                     | 9 (34.6)                                  |
| <b>Male, <i>n</i> (%)</b>                   | 41 (78.8)                     | 21 (80.8)                                 |
| <b>Race, <i>n</i> (%)</b>                   |                               |                                           |
| White                                       | 37 (71.2)                     | 24 (92.3)                                 |
| Black                                       | 4 (7.7)                       | 1 (3.8)                                   |
| Asian                                       | 9 (17.3)                      | 1 (3.8)                                   |
| Other                                       | 2 (3.8)                       | 0                                         |
| <b>Region, <i>n</i> (%)</b>                 |                               |                                           |
| North America                               | 21 (40.4)                     | 5 (19.2)                                  |
| Europe                                      | 22 (42.3)                     | 18 (69.2)                                 |
| Rest of the world                           | 9 (17.3)                      | 3 (11.5)                                  |
| <b>Smoking or tobacco use, <i>n</i> (%)</b> |                               |                                           |
| Current/former                              | 40 (76.9)                     | 17 (65.4)                                 |
| Never                                       | 10 (19.2)                     | 8 (30.8)                                  |
| Unknown                                     | 2 (3.8)                       | 1 (3.8)                                   |

| Characteristics                       | Nivolumab<br>(n = 52) | Investigator's choice<br>(n = 26) |
|---------------------------------------|-----------------------|-----------------------------------|
| <b>ECOG performance status, n (%)</b> |                       |                                   |
| 0                                     | 11 (21.2)             | 5 (19.2)                          |
| 1                                     | 41 (78.8)             | 20 (76.9)                         |
| 2                                     | 0                     | 1 (3.8)                           |
| <b>HPV status, n (%)</b>              |                       |                                   |
| Positive                              | 10 (19.2)             | 6 (23.1)                          |
| Negative                              | 15 (28.8)             | 8 (30.8)                          |
| Not tested <sup>a</sup>               | 27 (51.9)             | 12 (46.2)                         |
| <b>PD-L1 expression, n (%)</b>        |                       |                                   |
| ≥1%                                   | 24 (46.2)             | 14 (53.8)                         |
| <1%                                   | 13 (25.0)             | 7 (26.9)                          |
| Not quantifiable                      | 15 (28.8)             | 5 (19.2)                          |

<sup>a</sup>HPV status testing only required for patients with oropharyngeal cancer.

Abbreviations: ECOG, Eastern Cooperative Oncology Group; HPV, human papillomavirus; PD-L1, programmed death ligand 1.

**Table S2.** Response among patients receiving nivolumab or investigator’s choice as first-line treatment for recurrent or metastatic squamous cell carcinoma of the head and neck after progressing on or after platinum therapy (within 6 months) in the adjuvant or primary (i.e., with radiation) setting for locally advanced disease.

|                                                 | <b>Nivolumab</b><br><b>(n = 52)</b> | <b>Investigator’s choice</b><br><b>(n = 26)</b> |
|-------------------------------------------------|-------------------------------------|-------------------------------------------------|
| <b>Best overall response, n (%)</b>             |                                     |                                                 |
| Complete response                               | 2 (3.8)                             | 0                                               |
| Partial response                                | 8 (15.4)                            | 3 (11.5)                                        |
| Stable disease                                  | 11 (21.2)                           | 8 (30.8)                                        |
| Progressive disease                             | 18 (34.6)                           | 8 (30.8)                                        |
| Unable to determine                             | 13 (25.0)                           | 7 (26.9)                                        |
| <b>ORR, n (%)</b>                               | 10 (19.2)                           | 3 (11.5)                                        |
| [95% CI]                                        | [9.6–32.5]                          | [2.4-30.2]                                      |
| <b>Odds ratio (95% CI)</b>                      | 1.83 (0.46–7.31)                    |                                                 |
| <b>Time to response, median (range), months</b> | 2.0 (1.8–6.3)                       | 2.0 (1.9–4.6)                                   |

Abbreviations: CI, confidence interval; ORR, objective response rate.

**Table S3.** Most common TRAEs ( $\geq 10\%$  in any arm) and select TRAEs among patients receiving nivolumab or investigator's choice as first-line treatment for recurrent or metastatic squamous cell carcinoma of the head and neck after progressing on or after platinum therapy (within 6 months) in the adjuvant or primary (i.e., with radiation) setting for locally advanced disease.

| Patients, <i>n</i> (%)                               | Nivolumab<br>( <i>n</i> = 51) |           | Investigator's choice<br>( <i>n</i> = 25) |           |
|------------------------------------------------------|-------------------------------|-----------|-------------------------------------------|-----------|
|                                                      | Any grade                     | Grade 3–4 | Any grade                                 | Grade 3–4 |
| <b>Any event (<math>\geq 10\%</math> in any arm)</b> | 35 (68.6)                     | 14 (27.5) | 18 (72.0) <sup>a</sup>                    | 8 (32.0)  |
| Fatigue                                              | 9 (17.6)                      | 3 (5.9)   | 3 (12.0)                                  | 0         |
| Nausea                                               | 7 (13.7)                      | 0         | 5 (20.0)                                  | 0         |
| Pruritus                                             | 6 (11.8)                      | 0         | 0                                         | 0         |
| Asthenia                                             | 4 (7.8)                       | 0         | 5 (20.0)                                  | 1 (4.0)   |
| Vomiting                                             | 3 (5.9)                       | 0         | 3 (12.0)                                  | 0         |
| Dry skin                                             | 2 (3.9)                       | 0         | 3 (12.0)                                  | 0         |
| Mucosal inflammation                                 | 1 (2.0)                       | 0         | 5 (20.0)                                  | 0         |
| Alopecia                                             | 0                             | 0         | 4 (16.0)                                  | 0         |
| <b>Select TRAEs</b>                                  |                               |           |                                           |           |
| Skin                                                 | 10 (19.6)                     | 0         | 4 (16.0)                                  | 1 (4.0)   |
| Endocrine                                            | 4 (7.8)                       | 0         | 0                                         | 0         |
| Gastrointestinal                                     | 4 (7.8)                       | 1 (2.0)   | 2 (8.0)                                   | 0         |
| Hepatic                                              | 3 (5.9)                       | 0         | 1 (4.0)                                   | 0         |
| Pulmonary                                            | 1 (2.0)                       | 0         | 1 (4.0)                                   | 0         |
| Renal                                                | 1 (2.0)                       | 0         | 0                                         | 0         |
| Hypersensitivity/infusion reactions                  | 2 (3.9)                       | 0         | 1 (4.0)                                   | 1 (4.0)   |

<sup>a</sup>Includes 1 grade 5 event of pneumonia.

Abbreviation: TRAE, treatment-related adverse event.

**Table S4.** Most common TRAEs ( $\geq 10\%$  in any arm) and select TRAEs in the overall treated population.

| Patients, <i>n</i> (%)                               | Nivolumab<br>( <i>n</i> = 236) |           | Investigator's choice<br>( <i>n</i> = 111) |           |
|------------------------------------------------------|--------------------------------|-----------|--------------------------------------------|-----------|
|                                                      | Any grade                      | Grade 3–4 | Any grade                                  | Grade 3–4 |
| <b>Any event (<math>\geq 10\%</math> in any arm)</b> | 146 (61.9)                     | 36 (15.3) | 88 (79.3) <sup>a</sup>                     | 40 (36.0) |
| Fatigue                                              | 37 (15.7)                      | 5 (2.1)   | 20 (18.0)                                  | 3 (2.7)   |
| Nausea                                               | 22 (9.3)                       | 0         | 23 (20.7)                                  | 1 (0.9)   |
| Diarrhea                                             | 20 (8.5)                       | 1 (0.4)   | 16 (14.4)                                  | 2 (1.8)   |
| Anemia                                               | 12 (5.1)                       | 3 (1.3)   | 19 (17.1)                                  | 6 (5.4)   |
| Asthenia                                             | 10 (4.2)                       | 1 (0.4)   | 17 (15.3)                                  | 2 (1.8)   |
| Stomatitis                                           | 6 (2.5)                        | 1 (0.4)   | 12 (10.8)                                  | 3 (2.7)   |
| Mucosal inflammation                                 | 4 (1.7)                        | 0         | 15 (13.5)                                  | 2 (1.8)   |
| Alopecia                                             | 0                              | 0         | 14 (12.6)                                  | 0         |
| <b>Select TRAEs</b>                                  |                                |           |                                            |           |
| Skin                                                 | 40 (16.9)                      | 0         | 14 (12.6)                                  | 2 (1.8)   |
| Endocrine                                            | 22 (9.3)                       | 1 (0.4)   | 1 (0.9)                                    | 0         |
| Gastrointestinal                                     | 20 (8.5)                       | 1 (0.4)   | 17 (15.3)                                  | 2 (1.8)   |
| Hepatic                                              | 7 (3.0)                        | 2 (0.8)   | 5 (4.5)                                    | 1 (0.9)   |
| Pulmonary                                            | 7 (3.0)                        | 2 (0.8)   | 1 (0.9)                                    | 0         |
| Renal                                                | 3 (1.3)                        | 0         | 2 (1.8)                                    | 1 (0.9)   |
| Hypersensitivity/infusion reactions                  | 3 (1.3)                        | 0         | 2 (1.8)                                    | 1 (0.9)   |

<sup>a</sup>Includes 1 grade 5 event of pneumonia.

Abbreviation: TRAE, treatment-related adverse event.
